# Supplementary material
Source: Elsevier journal article supplement (https://www.sciencedirect.com/science/article/pii/S2603647921000877)
Supplement: mmc1 [file S2603647921000877:mmc1.doc]

Anexo I. Cuestionario dirigido a docentes.

- Marcando esta casilla usted acepta la participación en el estudio conforme a lo detallado en el consentimiento informado
- Acepto
- No acepto

**Le recordamos que los datos personales requeridos se han limitado a los estrictamente relevantes para llevar a cabo el estudio**

- Edad *(especificar)*
- Sexo
- Mujer
- Hombre
- Prefiero no decirlo
- Otro *(especificar)*
- Nacionalidad *(especificar)*
- Localidad de Residencia *(especificar)*
- Estado Civil
- Soltero
- Casado/Conviviendo en pareja
- Separado/Divorciado
- Viudo
- ¿Tiene usted hijos?
- Sí
- No
- Cargo que desempeña actualmente
- Equipo directivo
- Orientador
- Docente
- Nivel de enseñanza
- Infantil
- Primaria
- Secundaria
- Años de ejercicio profesional (si es <12 meses ponga 1 año) *(especificar)*
- Años trabajando en este centro (si es <12 meses ponga 1 año) *(especificar)*
- Dispone el centro de enfermera escolar
- Sí
- No

**CUESTIONARIO**

1. ¿Tiene o ha tenido algún alumno con discapacidad, enfermedad o problema médico crónico durante el último año?

- Sí
- No *Pase a pregunta 2*
- No sabe/No contesta (NS/NC) *Pase a pregunta 2*

Cuál de las siguientes

- Asma
- Artritis
- Dermatitis
- Parálisis cerebral
- Diabetes
- Fibrosis Quística
- Epilepsia
- Alergia
- Otro *(especificar)*

1. ¿Existen en el centro protocolos específicos para atender a los alumnos con patología crónica?

- Sí
- No
- NS/NC

1. ¿Ha recibido el personal del centro formación específica sobre la atención al alumno con patología crónica?

- Sí
- No *Pase a pregunta 4*
- NS/NC *Pase a pregunta 4*

¿Quién se la ha proporcionado?

- Padres
- Personal sanitario especializado (Hospital)
- Personal sanitario de Atención Primaria (Centro de Salud)
- Otro *(especificar)*

1. ¿Pueden los alumnos con patología crónica participar en todas las actividades escolares?

- Sí
- No
- NS/NC

1. ¿Se toman precauciones especiales para los alumnos con patología crónica durante las actividades deportivas y extracurriculares (excursiones, etc)?

- Sí
- No
- NS/NC

1. ¿Ha experimentado algún alumno una urgencia o accidente en el centro en el último año (como hipoglucemia, caída con fractura de hueso, etc)?

- Sí
- No *Pase a pregunta 7*
- NS/NC *Pase a pregunta 7*

¿Cuántas? *(especificar)*

1. En el supuesto de atender una urgencia o accidente durante la clase, ¿cuánto tiempo, de media, le tendría que dedicar?

- Ninguno/ Escaso/ menos de 10 minutos
- Moderado/ 10-20 minutos
- Sustancial/ 20-30 minutos
- Extenso/ más de 30 minutos

1. ¿Considera que la asistencia de urgencias o accidentes durante la jornada lectiva irrumpe en el normal funcionamiento de la clase en detrimento del resto de alumnos?

- Sí
- No
- NS/NC

1. ¿Dispone el centro de un botiquín de primeros auxilios?

- Sí
- No *Pase a pregunta 10*
- NS/NC *Pase a pregunta 10*

¿Sabe dónde se encuentra situado?

- Sí
- No
- NS/NC

¿Conoce su contenido?

- Sí
- No
- NS/NC

¿Hay en el centro alguien encargado de revisar periódicamente el material anteriormente citado (medicación y botiquín)?

- Sí
- No
- NS/NC

1. ¿Dispone el centro de un desfibrilador externo automático (DEA)?

- Sí
- No *Pase a pregunta 11*
- NS/NC *Pase a pregunta 11*

¿Sabe dónde se encuentra situado?

- Sí
- No
- NS/NC

¿Sabría utilizarlo?

- Sí
- No
- NS/NC

1. ¿Cree que su centro está capacitado para manejar urgencias?

- Sí
- No
- NS/NC

1. ¿Se considera capacitado para actuar ante una urgencia o accidente?

- Sí
- No
- NS/NC

1. ¿Estaría dispuesto a administrar medicación en caso de necesidad?

- Sí
- No
- NS/NC

1. Si usted tuviera que promover un proyecto para la mejora de la asistencia en caso de urgencia o accidente durante la jornada escolar, ¿cuál elegiría?, indique por orden de preferencia, donde la opción 1 es máxima prioridad y la opción 4 es mínima prioridad: *(seleccione todos los que correspondan)*

|  | Opción 1 | Opción 2 | Opción 3 | Opción 4 |  |
| --- | --- | --- | --- | --- | --- |
| Las autoridades escolares deberían promover la formación del personal del centro (docente y no docente) a cargo de personal sanitario cualificado |  |  |  |  |  |
| Deberían establecerse protocolos de actuación en colaboración con el Servicio Público de Salud |  |  |  |  |  |
| Las autoridades escolares y sanitarias deberían promover la implantación de personal de enfermería en los centros |  |  |  |  |  |
| Ninguna actividad, ya que los alumnos reciben toda la asistencia que necesitan |  |  |  |  |  |

Anexo II. Cuestionario dirigido a sanitarios.

- Marcando esta casilla usted acepta la participación en el estudio conforme a lo detallado en el consentimiento informado
- Acepto
- No acepto

**Le recordamos que los datos personales requeridos se han limitado a los estrictamente relevantes para llevar a cabo el estudio**

- Edad *(especificar)*
- Sexo
- Mujer
- Hombre
- Prefiero no decirlo
- Otro *(especificar)*
- Nacionalidad *(especificar)*
- Localidad de Residencia *(especificar)*
- Estado Civil
- Soltero
- Casado/Conviviendo en pareja
- Separado/Divorciado
- Viudo
- ¿Tiene usted hijos?
- Sí
- No
- Categoría profesional
- Pediatra
- Enfermera Pediatría
- Años de ejercicio profesional (si es <12 meses ponga 1 año) *(especificar)*
- Años en su actual puesto de trabajo (si es <12 meses ponga 1 año) *(especificar)*

**CUESTIONARIO**

1. ¿Le ha solicitado algún centro escolar de su área sanitaria/zona básica de salud (ZBS) colaboración para el desarrollo de programas/actividades relacionadas con educación para la salud (EpS)?

- Sí
- No *Pase a pregunta 2*
- No sabe/No contesta (NS/NC) *Pase a pregunta 2*

¿A quién iba dirigida la formación? (seleccione todos los que correspondan)

- Alumnos
- Padres
- Docentes
- Grupos Mixtos

¿Se trataba de una formación desarrollada de manera puntual (no incluida en la programación de actividades del centro en cursos anteriores)?

- Sí
- No
- NS/NC

1. ¿Le ha solicitado algún centro escolar de su área sanitaria/ZBS colaboración para el desarrollo de programas/actividades relacionadas con patología específica, urgencias o accidentes general?

- Sí
- No *Pase a pregunta 3*
- No sabe/No contesta (NS/NC) *Pase a pregunta 3*

¿A quién iba dirigida la formación? (seleccione todos los que correspondan)

- Alumnos
- Padres
- Docentes
- Grupos Mixtos

¿Se trataba de una formación desarrollada de manera puntual (no incluida en la programación de actividades del centro en cursos anteriores)?

- Sí
- No
- NS/NC

1. ¿Con qué frecuencia cree que los padres de niños con patología crónica notifican a los centros escolares el diagnóstico y tratamiento/cuidados correspondientes?

- Siempre
- Frecuentemente
- A Veces
- Rara vez
- Nunca

1. ¿Conoce si en los centros escolares de su área sanitaria/ZBS existen protocolos específicos para asistir a alumnos con patología crónica, urgencias o accidentes?

- Sí
- No
- NS/NC

1. ¿Disponen los centros escolares de su área sanitaria/ZBS de un botiquín de primeros auxilios? (material de curas, medicación de urgencia, dispositivos de vía aérea, etc)

- Sí, lo tienen
- No, no lo tienen *Pase a pregunta 6*
- No todos
- NS/NC *Pase a pregunta 6*

¿En los centros escolares de su área sanitaria/ZBS hay alguien encargado de revisar el botiquín de primeros auxilios?

- Sí
- No
- NS/NC

1. En el supuesto de una urgencia médica o un accidente ¿Cómo cree que lo solucionaría los centros escolares de su área sanitaria/ZBS? indique por orden de preferencia, donde la opción 1 es máxima prioridad y la opción 4 es mínima prioridad: *(seleccione todos los que correspondan)*

|  | Opción 1 | Opción 2 | Opción 3 | Opción 4 |  |
| --- | --- | --- | --- | --- | --- |
| Llamando al servicio de urgencias (112) |  |  |  |  |  |
| Con el asesoramiento de los padres |  |  |  |  |  |
| Con el personal del centro |  |  |  |  |  |
| Con asesoramiento médico (Atención Primaria) |  |  |  |  |  |

1. ¿Conoce si algún centro escolar de su área sanitaria/ZBS ha solicitado asistencia para una urgencia o accidente durante el pasado año lectivo?

- Sí
- No *Pase a pregunta 8*
- No sabe/No contesta (NS/NC) *Pase a pregunta 8*

¿Cuántas veces durante el pasado año lectivo? *(especificar)*

1. ¿Considera que los docentes, como norma general, están capacitados para asumir urgencias o accidentes?

- Sí
- No
- NS/NC

1. ¿Considera que los docentes, como norma general, están capacitados para hacer uso un desfibrilador externo automático (DEA)?

- Sí
- No
- NS/NC

1. ¿Considera los centros docentes de su área sanitaria/ZBS como un entorno seguro en cuanto a la gestión de urgencias y accidentes para el personal que lo integra y los estudiantes que acuden diariamente?

- Sí
- No
- NS/NC

1. Si usted tuviera que promover un proyecto para la mejora de la asistencia en caso de urgencia o accidente durante la jornada escolar, ¿cuál elegiría?, indique por orden de preferencia, donde la opción 1 es máxima prioridad y la opción 4 es mínima prioridad: *(seleccione todos los que correspondan)*

|  | Opción 1 | Opción 2 | Opción 3 | Opción 4 |  |
| --- | --- | --- | --- | --- | --- |
| Las autoridades escolares deberían promover la formación del personal del centro (docente y no docente) a cargo de personal sanitario cualificado |  |  |  |  |  |
| Deberían establecerse protocolos de actuación en colaboración con el Servicio Público de Salud |  |  |  |  |  |
| Las autoridades escolares y sanitarias deberían promover la implantación de personal de enfermería en los centros |  |  |  |  |  |
| Ninguna actividad, ya que los alumnos reciben toda la asistencia que necesitan |  |  |  |  |  |
